# Supplementary material
Source: Springer Nature journal article supplement (https://www.springermedizin.de/resource/supplementary/12877_2013_980_MOESM1_ESM.pdf/9440830)

## PHASE-20: skattningsskala för möjliga läkemedelsrelaterade symtom

### Bakgrundsdata

|              |  |                                                    |  |
|--------------|--|----------------------------------------------------|--|
| Namn patient |  | Personnummer                                       |  |
| Boende       |  | Kontaktuppgift sjuksköterska (namn, telefonnummer) |  |

Uppgifter kring diagnos samt efterfrågade lab- och mätvärden noteras av ansvarig sjuksköterska.

|           |  |  |  |
|-----------|--|--|--|
| Diagnoser |  |  |  |
|-----------|--|--|--|

|                                |    |     |                                                    |
|--------------------------------|----|-----|----------------------------------------------------|
| Under de tre senaste månaderna | Ja | Nej | Om ja, beskriv hur ofta det hänt samt trolig orsak |
| Konfusionsperiod               |    |     |                                                    |
| Fallolycka                     |    |     |                                                    |

|              |                                 |                                      |                                  |       |
|--------------|---------------------------------|--------------------------------------|----------------------------------|-------|
|              |                                 | Datum                                |                                  | Datum |
| Längd        |                                 |                                      | BT liggande                      |       |
| Vikt         |                                 |                                      | BT sittande/<br>stående          |       |
| S-kreatinin  |                                 |                                      | Puls                             |       |
| Är patienten | <input type="radio"/> Uppgående | <input type="radio"/> Rullstolsburen | <input type="radio"/> Sängbunden |       |

|                                                      |                            |                              |                                 |
|------------------------------------------------------|----------------------------|------------------------------|---------------------------------|
| Hur mycket har patienten kunnat delta i bedömningen? | <input type="radio"/> Helt | <input type="radio"/> Delvis | <input type="radio"/> Inte alls |
|------------------------------------------------------|----------------------------|------------------------------|---------------------------------|

|                                                                  |
|------------------------------------------------------------------|
| Övriga kommentarer (exempelvis svårigheter att svälja tabletter) |
|------------------------------------------------------------------|

PHASE-20 (Pharmacotherapeutical Symptom Evaluation, 20 frågor) är framtagen i samarbete mellan Läkemedelskommittén i Landstinget i Uppsala län och FoU Äldre, Regionförbundet Uppsala län. (Hedström M, Lidström B, Hulter Åsberg K. (2009). PHASE-20: ett nytt instrument för skattning av möjliga läkemedelsrelaterade symtom hos äldre personer i äldreboende. *Nordic Journal of Nursing Research and Clinical Studies (Vård i Norden)*; 4:9-14). Efterfrågad bakgrundinformation har justerats för Region Skånes räkning

Dokumentansvarig: Åsa Bondesson, Läkemedelsenhets, Koncernkontoret, Region Skåne

Version 2011-03-28

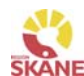

## PHASE-20: skattningsskala för möjliga läkemedelsrelaterade symtom

|       |                                                   |
|-------|---------------------------------------------------|
| Datum | Kontaktuppgift vårdpersonal (namn, telefonnummer) |
|-------|---------------------------------------------------|

Sätt ett kryss i det alternativ som bäst motsvarar besvärnivån under de senaste två veckorna. Eventuella förtydligande lämnas i kommentarer, alternativt under övriga kommentarer. Stryk under de symtom som stämmer bäst och stryk över de symtom som inte stämmer.

| Symtom                                   | Besvärnivå (besvär) |     |          |       | Kommentarer: |
|------------------------------------------|---------------------|-----|----------|-------|--------------|
|                                          | Inga                | Små | Måttliga | Stora |              |
| 1. Yr/ostadig/faller lätt                |                     |     |          |       |              |
| 2. Trött/dåsig/orkeslös                  |                     |     |          |       |              |
| 3. Sover dåligt/mardrömmar               |                     |     |          |       |              |
| 4. Ont i magen/ont i bröstet             |                     |     |          |       |              |
| 5. Huvudvärk                             |                     |     |          |       |              |
| 6. Nedstämd                              |                     |     |          |       |              |
| 7. Orolig/ängestfylld                    |                     |     |          |       |              |
| 8. Lättirriterad                         |                     |     |          |       |              |
| 9. Glömsk                                |                     |     |          |       |              |
| 10. Dålig aptit                          |                     |     |          |       |              |
| 11. Muntorr                              |                     |     |          |       |              |
| 12. Illamående/kräks                     |                     |     |          |       |              |
| 13. Diarré                               |                     |     |          |       |              |
| 14. Förstoppning                         |                     |     |          |       |              |
| 15. Hjärtklappning                       |                     |     |          |       |              |
| 16. Svullna ben                          |                     |     |          |       |              |
| 17. Andfådd                              |                     |     |          |       |              |
| 18. Täta urinträngningar/<br>urinläckage |                     |     |          |       |              |
| 19. Klåda/utslag                         |                     |     |          |       |              |
| 20. Annat (till exempel smärta)          |                     |     |          |       |              |

PHASE-20 (Pharmacotherapeutical Symptom Evaluation, 20 frågor) är framtagen i samarbete mellan Läkemedelskommittén i Landstinget i Uppsala län och FoU Äldre, Regionförbundet Uppsala län. (Hedström M, Lidström B, Hulter Åsberg K. (2009). PHASE-20: ett nytt instrument för skattning av möjliga läkemedelsrelaterade symtom hos äldre personer i äldreboende. *Nordic Journal of Nursing Research and Clinical Studies (Vård i Norden)*; 4:9-14). Efterfrågad bakgrundinformation har justerats för Region Skånes räkning

Dokumentansvarig: Åsa Bondesson, Läkemedelsenhets, Koncernkontoret, Region Skåne

Version 2011-03-28

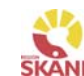

Supplement: MOESM1 [file 9440830]
